# Supplementary material for: Inorganic–organic hybrids constructed from heteropolymolybdate anions and copper–organic fragments: syntheses, structures and properties
Source: Royal Society of Chemistry journal article supplement (doi:10.1039/c004063k), 2010-09-22
Supplement: c004063k.pdf [file c004063k.pdf]

# Inorganic-organic Hybrids Constructed from Heteropolymolybdate Anions and Copper-organic Fragments: Syntheses, Structures and Properties

Hai-Juan Jin,<sup>†</sup> Bai-Bin Zhou,<sup>\*,†,§</sup> Yang Yu,<sup>†</sup> Zhi-Feng Zhao,<sup>§</sup> Zhan-Hua Su<sup>†</sup>

*Department of Chemistry, Harbin Normal University, Harbin 150080, P. R. China, and Department of Applied Chemistry, Harbin Institute of Technology, Harbin 150001, P. R. China*

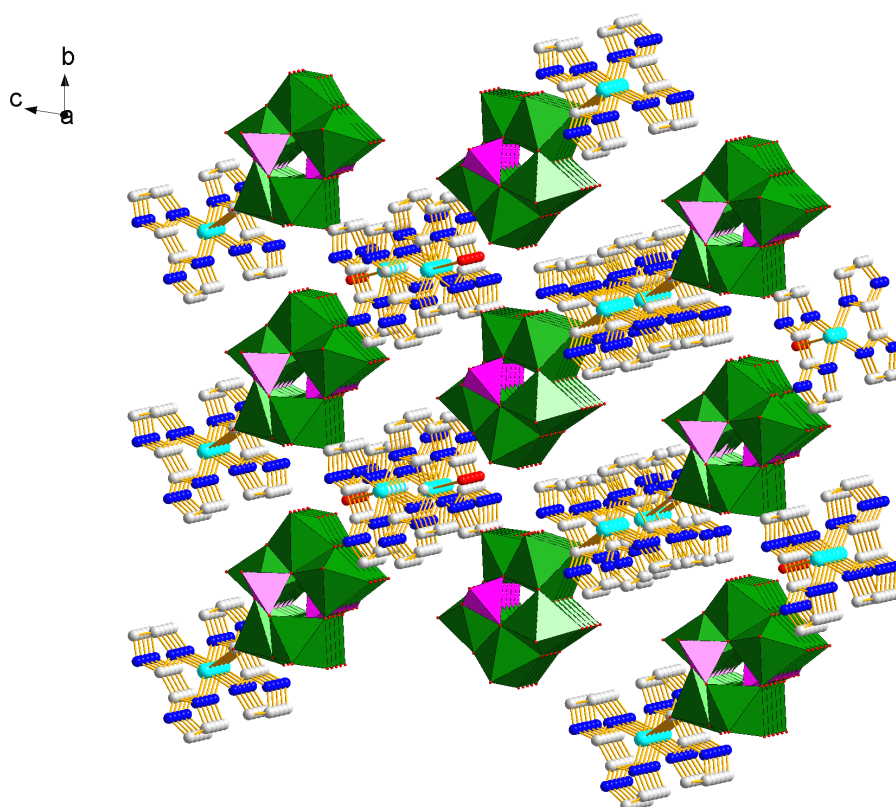

Fig. S1. View of the 3D supramolecular network of compound **1**. All the hydrogen atoms and isolated water molecules are omitted for clarity. The color codes are as follows: Cu (turquoise), O (red), C (gray), N (blue), MoO<sub>6</sub> octahedra (green), PO<sub>4</sub> tetrahedron (pink).

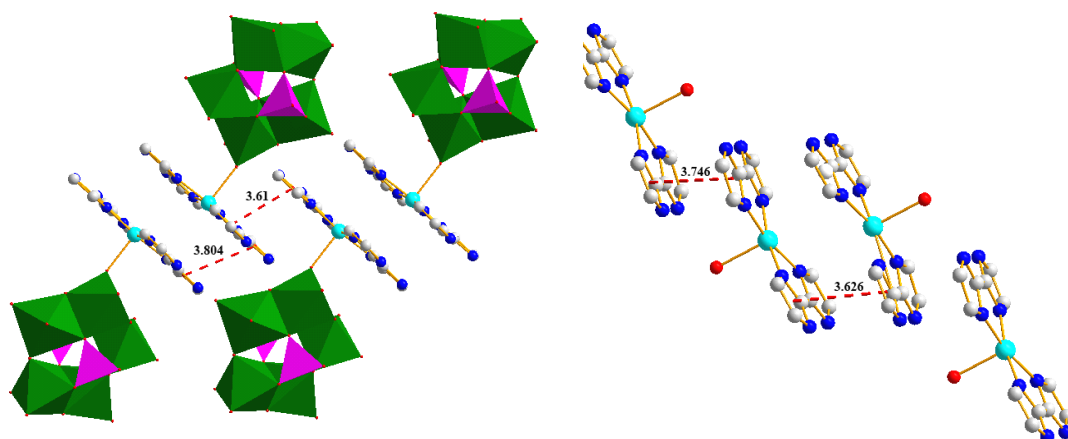

Fig. S2. View of the distances of  $\pi$ - $\pi$  stacking interaction between imidazole rings in compound **1**. The color codes are as follows: Cu (turquoise), O (red), C (gray), N (blue), MoO<sub>6</sub> octahedra (green), PO<sub>4</sub> tetrahedron (pink).

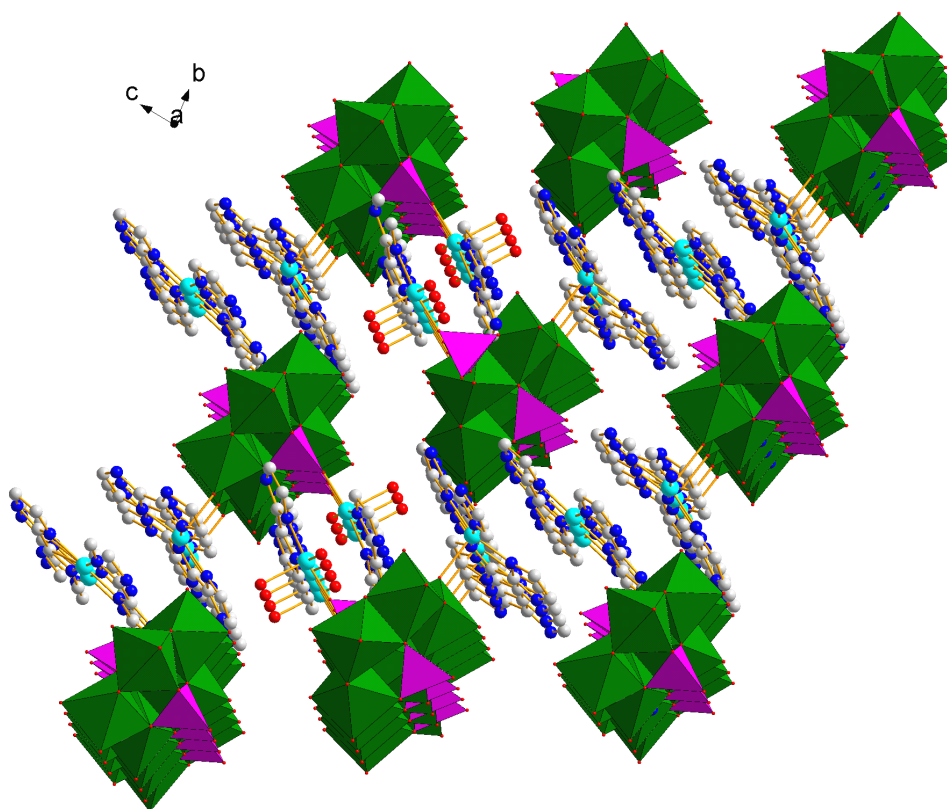

Fig. S3. View of the 3D supramolecular network of compound **2**. All the hydrogen atoms and isolated water molecules are omitted for clarity. The color codes are as follows: Cu (turquoise), O (red), C (gray), N (blue), MoO<sub>6</sub> octahedra (green), PO<sub>4</sub> tetrahedron (pink).

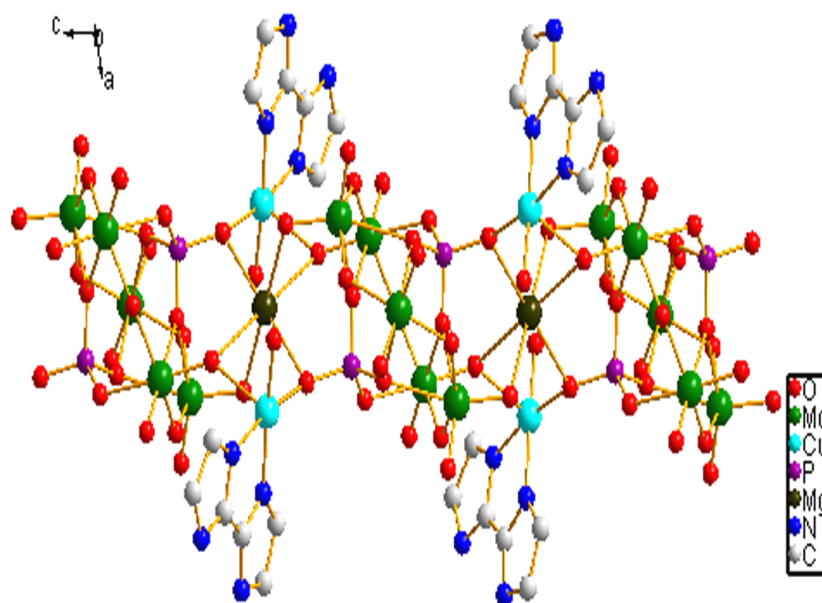

Fig. S4. View of the molecule structure of compound **4**. H atoms and free water molecules have been omitted.

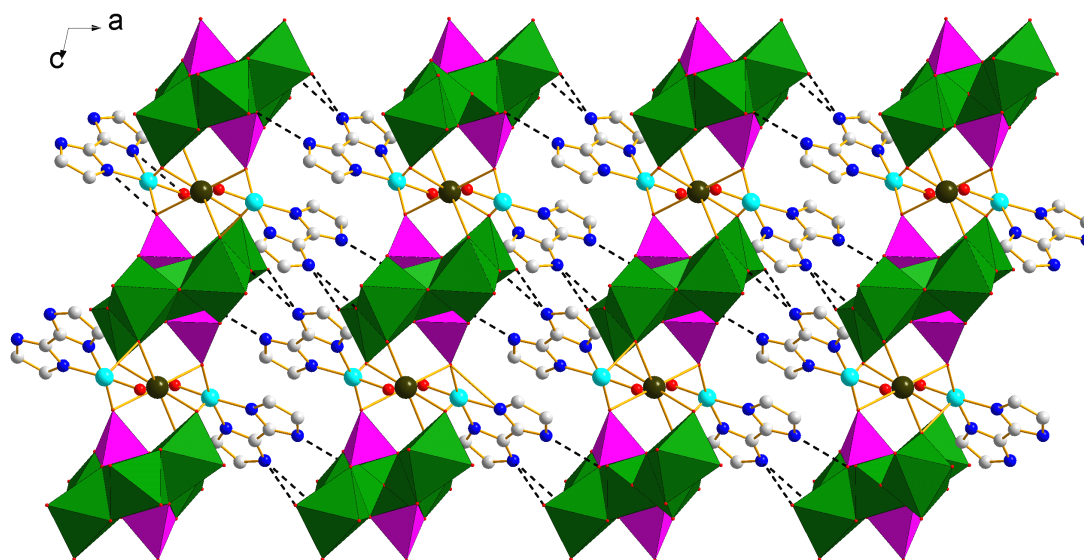

Fig. S5 View of the 2D supramolecular network of compound **4** construct from hydrogen-bonding interactions along ac plane. All the hydrogen atoms and isolated water molecules are omitted for clarity. The color codes are as follows: Cu (turquoise), Mg (olive green), O (red), C (gray), N (blue), MoO<sub>6</sub> octahedra (green), PO<sub>4</sub> tetrahedron (pink).

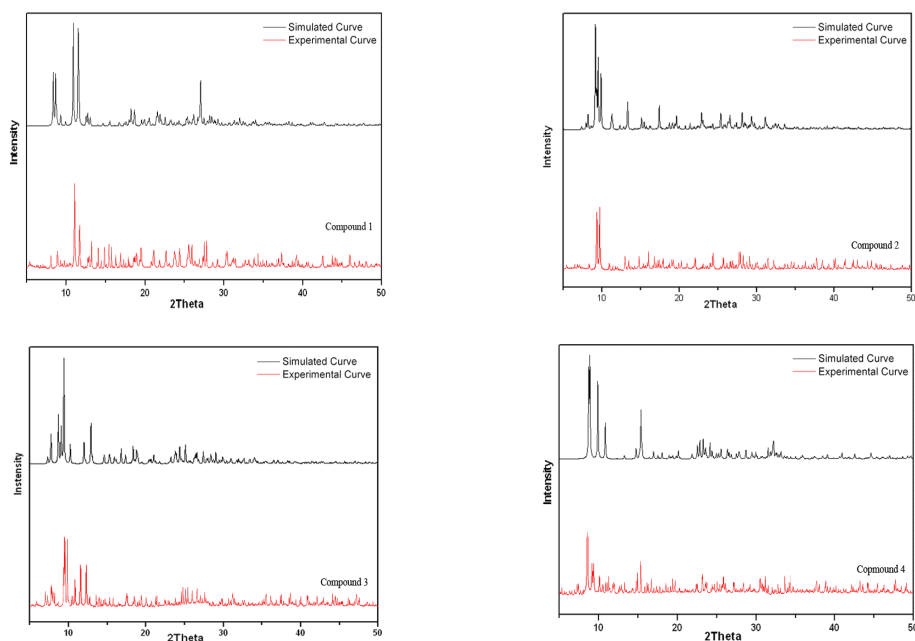

Fig. S6. The XPRD contrast curves of **1-4**.

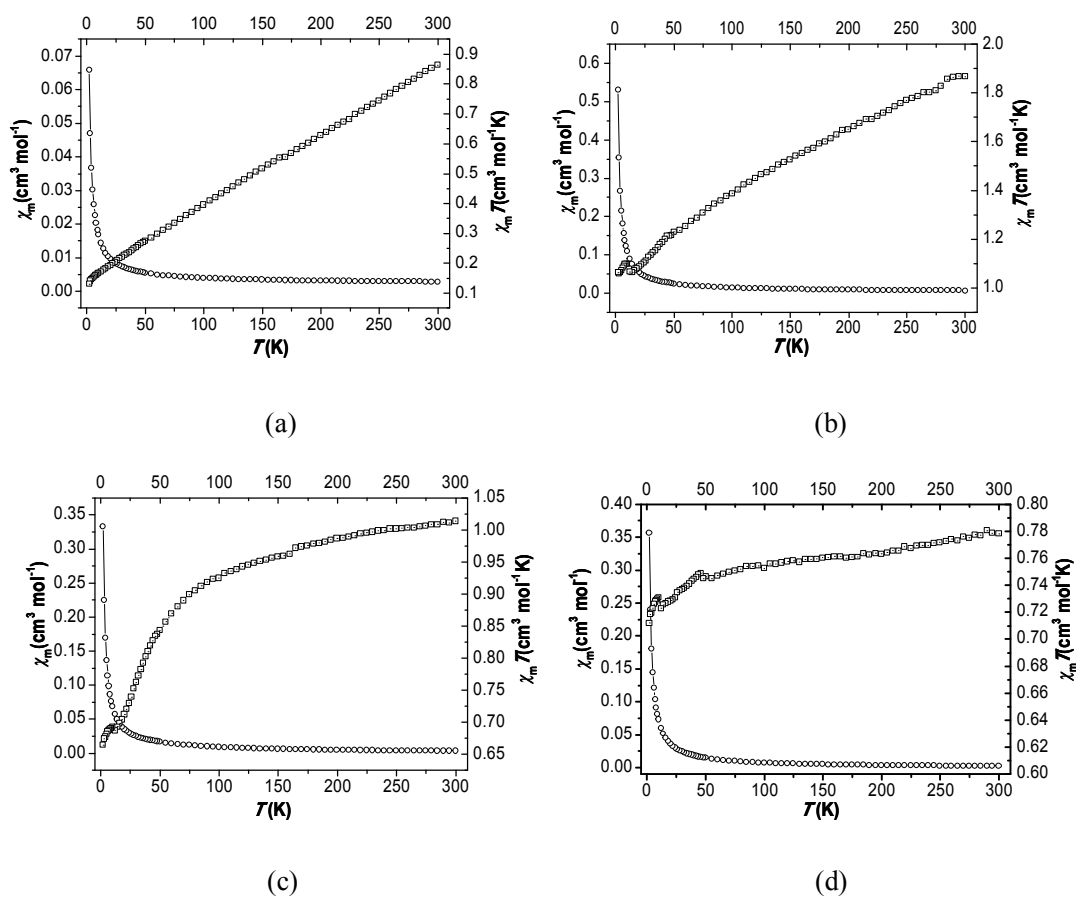

Fig. S7. Temperature dependences of  $\chi_m$  and  $\chi_m T$  for **1** (a), **2** (b), **3** (c) and **4** (d).

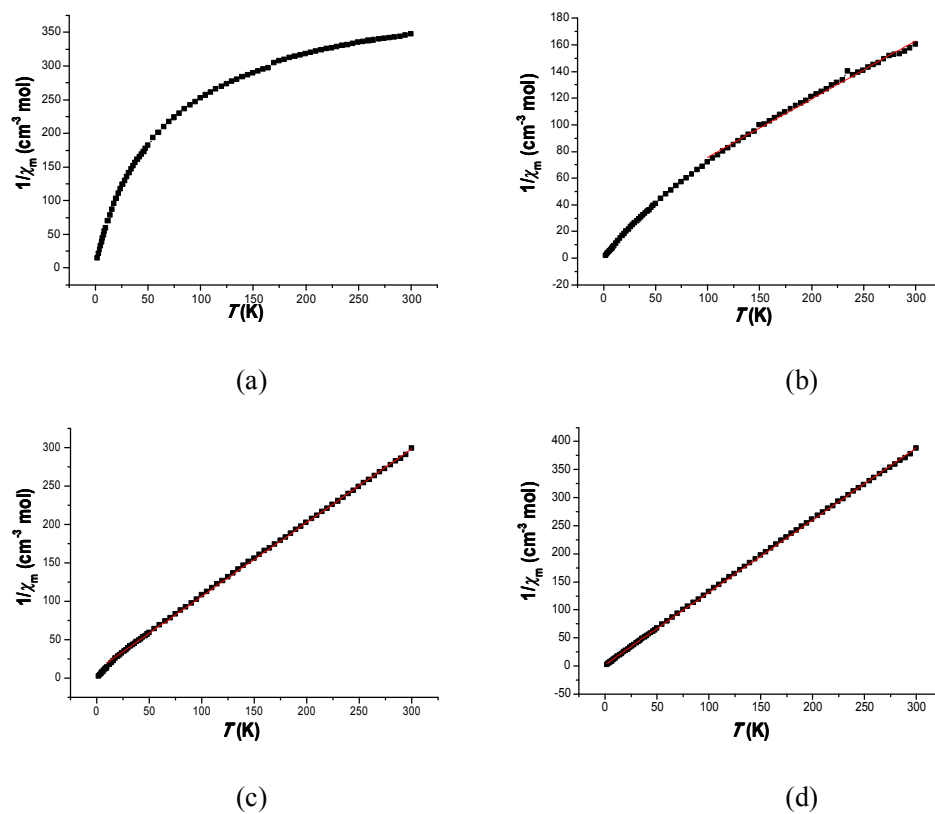

Fig. S8. Temperature dependences of  $\chi_m^{-1}$  for **1** (a), **2** (b), **3** (c) and **4** (d).

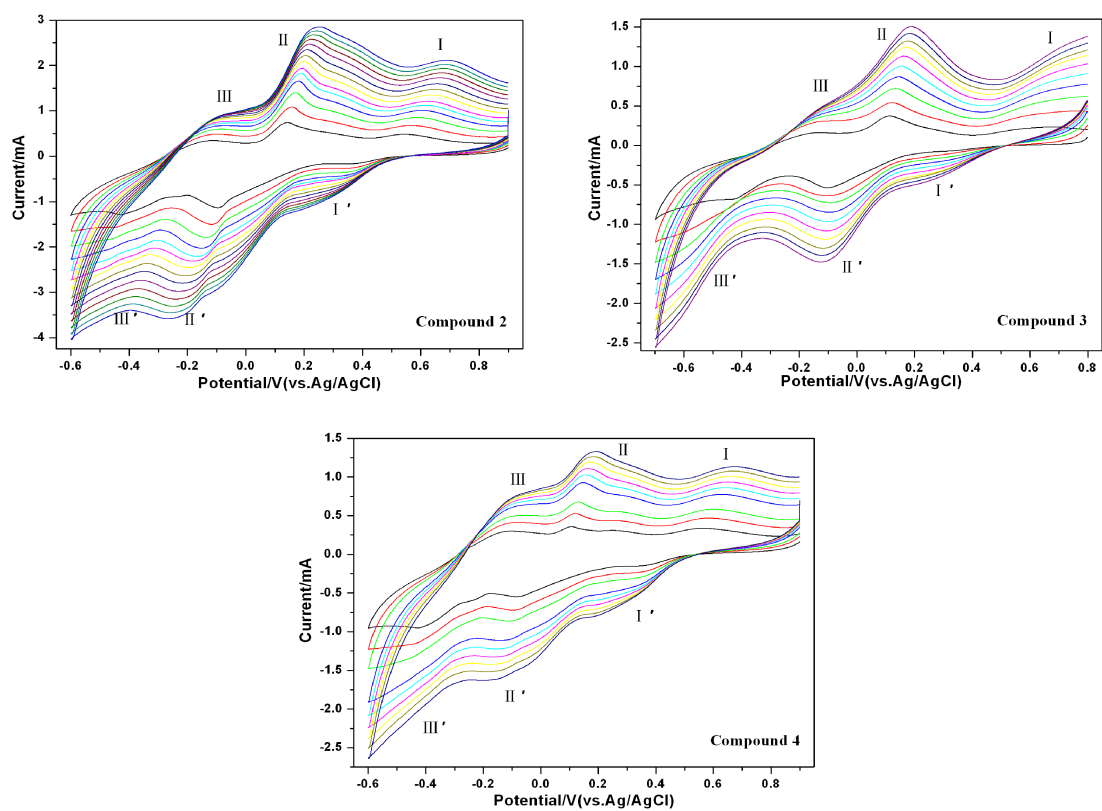

Fig. S9. The electrochemical behaviors of CPEs for compounds 2, 3, 4.

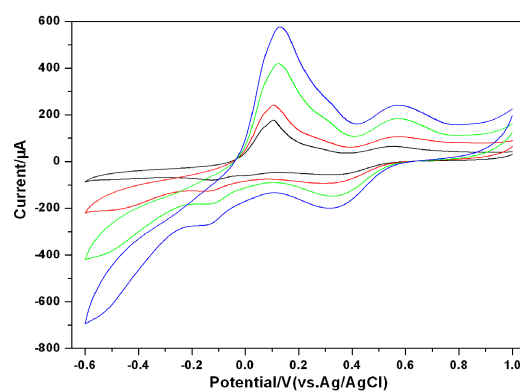

Fig. S10. Cyclic voltammograms of **1**-CPE in 1 M H<sub>2</sub>SO<sub>4</sub> containing 0 (a), 3.8 (b), 7.5 (c), and 15 (d) mM NaNO<sub>2</sub>. Scan rate: 80 mV·s<sup>-1</sup>.
